# Supplementary material for: Co-crystal synthesis of 2- and 4-mercaptopyridines with thiourea and its analogue, trithiocyanuric acid
Source: Royal Society of Chemistry journal article supplement (doi:10.1039/d2ce00592a), 2022-01-01
Supplement: d2ce00592a1.pdf [file d2ce00592a1.pdf]

**Co-crystals synthesis of 2- and 4-mercaptopyridine with thiourea and its  
analogue, trithiocyanuric acid**

*Kinga Wzgarda-Raj, Olga Książkiewicz, Marcin Palusiak*

*Department of Physical Chemistry, Faculty of Chemistry, University of Lodz, Pomorska 163/165, 90-  
236 Lodz, Poland*

e-mail: [marcin.palusiak@chemia.uni.lodz.pl](mailto:marcin.palusiak@chemia.uni.lodz.pl)

**Electronic Supplementary Information**

**Table S1.** Parameters of selected S...S chalcogen contacts for co-crystals deposited in the Cambridge Structural Database [CSD, Version 5.43, Release of November 2021].

| REFCODE               | C...S [Å] | S...S [Å]                                                                           | C-S...S [°] |
|-----------------------|-----------|-------------------------------------------------------------------------------------|-------------|
|                       |           | 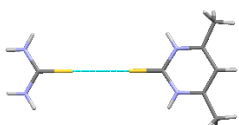   |             |
| PUZMIJ <sup>1</sup>   | 1.705     | 3.283                                                                               | 169         |
|                       |           |    |             |
| YOTJAT <sup>2</sup>   | 1.698     | 3.348                                                                               | 180         |
|                       |           |    |             |
| BAFVEJ <sup>3</sup>   | 1.700     | 3.542                                                                               | 158         |
| NEXSIU <sup>4</sup>   | 1.707     | 3.377                                                                               | 155         |
| NEXSIU01 <sup>4</sup> | 1.703     | 3.396                                                                               | 156         |
| POVQOI <sup>5</sup>   | 1.696     | 3.457                                                                               | 179         |
| QOFSOW <sup>6</sup>   | 1.708     | 3.333                                                                               | 180         |
| RUJJIR                | 1.718     | 3.469                                                                               | 148         |
| RUQJUK                | 1.738     | 3.373                                                                               | 150         |
| TOPXED <sup>7</sup>   | 1.696     | 3.556                                                                               | 160         |
| VUGNIX                | 1.702     | 3.495                                                                               | 157         |
| VUGNUJ <sup>8</sup>   | 1.691     | 3.511                                                                               | 166         |
| ZUCYED <sup>9</sup>   | 1.697     | 3.567                                                                               | 156         |
| ZUCIYH <sup>9</sup>   | 1.702     | 3.577                                                                               | 164         |
|                       |           |  |             |
| GAPGIP <sup>10</sup>  | 1.740     | 3.320                                                                               | 160         |
|                       |           |  |             |
| GAPGIP <sup>10</sup>  | 1.741     | 3.486                                                                               | 163         |
| KIZZOL <sup>11</sup>  | 1.734     | 3.586                                                                               | 146         |
| KOBCAI <sup>11</sup>  | 1.713     | 3.339                                                                               | 169         |

## References:

- [1] A.Okuniewski, D.Rosiak, J.Chojnacki, *Acta Crystallogr.,Sect.C:Cryst.Struct.Chem.* (2020), **76**, 468.
- [2] P.A.Gaye, A.H.Barry, M.Gaye, A.D.Sarr, A.S.Sall, *Acta Crystallogr.,Sect.E:Struct.Rep.Online* (2009), **65**, 1252.
- [3] R.Thaimattam, D.S.Reddy, Feng Xue, T.C.W.Mak, A.Nangia, G.R.Desiraju, *J.Chem.Soc.,Perkin Trans.2* (1998), 1783.
- [4] H.Tomkowiak, A.Olejniczak, A.Katrusiak, *Cryst.Growth Des.* (2013), **13**, 121.
- [5] K.Kossev, H.Sbirkova, N.Petrova, B.Shivachev, R.P.Nikolova, *Bulgarian Chemical Communications* (2013), **45**, 446.
- [6] Cindy Doring, J.F.D.Lueck, P.G.Jones, *Z.Naturforsch.,B:Chem.Sci.* (2017), **72**, 441.
- [7] L.P.Nair, B.R.Bijini, S.Prasanna, C.M.K.Nair, M.Deepa, K.Rajendra Babu, *Spectrochim.Acta,Part A* (2014), **120**, 517.
- [8] Yuan Yang, Yun-Xia Yang, Qi Li, *Mol.Cryst.Liq.Cryst.* (2018), **667**, 126.
- [9] Yang, Yuan, Li, Ke, Yang, Yunxia, Li, Qi, *J.Chem.Cryst.* (2015), **45**, 120.
- [10] H.Zouihri, *Acta Crystallogr.,Sect.E:Struct.Rep.Online* (2012), **68**, 257.
- [11] Ming Li, Mingjun Xia, Huining Xiao, *Chem. Sel.* (2017), **2**, 5882.
